# Supplementary material for: Virus taxonomy: the database of the International Committee on Taxonomy of Viruses (ICTV)
Source: Oxford University Press journal article supplement (doi:10.1093/nar/gkx932), 2017-10-02
Supplement: gkx932_supp.pdf [file gkx932_supp.pdf]

## SUPPLEMENTARY TABLE AND FIGURE LEGENDS

### Supplementary Table 1. *Hepacivirus* Member Species

The member species table, provided within the ICTV Online (10<sup>th</sup>) Report chapters, provides the indicated information on exemplar viruses for each species. The species *Hepacivirus C*, also contains information on additional member viruses that have been classified by the hepacivirus research community as prototypic members of important clades of viruses that may have unique pathogenic, epidemiological, or other biological properties (1, 2).

1. Smith, D.B., Bukh, J., Kuiken, C., Muerhoff, A.S., Rice, C.M., Stapleton, J.T. and Simmonds, P. (2014) Expanded classification of hepatitis C virus into 7 genotypes and 67 subtypes: updated criteria and genotype assignment web resource. *Hepatology*, 59, 318-327.
2. Simmonds, P., Bukh, J., Combet, C., Deleage, G., Enomoto, N., Feinstone, S., Halfon, P., Inchauspe, G., Kuiken, C., Maertens, G. et al. (2005) Consensus proposals for a unified system of nomenclature of hepatitis C virus genotypes. *Hepatology*, 42, 962-973.

Supplementary Figure 1. Taxon search. Results from the taxonomy search interface provided from the taxonomy browser web page (<http://ictv.global/virusTaxonomy.asp>). The search set can comprise the entire history of ICTV taxonomy releases, or just the current release. The 'View' link will take the user to the row of the indicated release year in the taxonomy browser for the indicated taxon.

Supplementary Figure 2. Taxonomic proposals. This page provides a list of approved proposals available for download from the ICTV web site file repository ([http://ictv.global/Official\\_ICTV\\_Proposals.asp](http://ictv.global/Official_ICTV_Proposals.asp)) that detail the justification for each taxonomic change.

Supplementary Table 1. *Hepacivirus* Member Species

| Species              | Virus name(s)                    | Exemplar isolate | Exemplar accession number | Available sequence* | Other isolates | Other isolate accession numbers | Virus Abbreviation(s) |
|----------------------|----------------------------------|------------------|---------------------------|---------------------|----------------|---------------------------------|-----------------------|
| <i>Hepacivirus A</i> | Non-primate<br>hepacivirus       | NZP1             | KP325401                  | CG                  |                |                                 | NZP1                  |
| <i>Hepacivirus B</i> | GB virus-B                       | GBV-B-T1053      | U22304                    | CG                  |                |                                 | GBV-B                 |
| <i>Hepacivirus C</i> | hepatitis C virus<br>genotype 1a | H77              | AF011751                  | CG                  |                |                                 | HCV-H77               |
|                      | hepatitis C virus<br>genotype 1a |                  |                           |                     | HCV-PT         | M62321                          | HCV-PT                |
|                      | hepatitis C virus<br>genotype 1b |                  |                           |                     | J              | D90208                          | HCV-J                 |
|                      | hepatitis C virus<br>genotype 2a |                  |                           |                     | HC-J6          | D00944                          | HCV-HC-J6             |
|                      | hepatitis C virus<br>genotype 2b |                  |                           |                     | HC-J8          | D01221                          | HCV-HC-J8             |
|                      | hepatitis C virus<br>genotype 3a |                  |                           |                     | NZL-1          | D17763                          | HCV-NZL-1             |
|                      | hepatitis C virus<br>genotype 3k |                  |                           |                     | JK049          | D63821                          | HCV-JK049             |
|                      | hepatitis C virus<br>genotype 4a |                  |                           |                     | ED43           | GU814265                        | HCV-ED43              |
|                      | hepatitis C virus<br>genotype 5a |                  |                           |                     | EUH1480        | Y13184                          | HCV-EUH1480           |
|                      | hepatitis C virus<br>genotype 6a |                  |                           |                     | EUHK2          | Y12083                          | HCV-EUHK2             |

|                      |                                  |                         |          |       |          |                         |
|----------------------|----------------------------------|-------------------------|----------|-------|----------|-------------------------|
|                      | hepatitis C virus<br>genotype 6g |                         |          | JK046 | D63822   | HCV-JK046               |
|                      | hepatitis C virus<br>genotype 7a |                         |          | QC-69 | EF108306 | HCV-QC69                |
| <i>Hepacivirus D</i> | Guereza<br>hepacivirus           | BWC08                   | KC551800 | CCG   |          | GHV-1-BWC08             |
| <i>Hepacivirus E</i> | rodent hepacivirus               | 339                     | KC815310 | CG    |          | RHV-339                 |
| <i>Hepacivirus F</i> | rodent hepacivirus               | NLR07-oct70             | KC411784 | CCG   |          | NLR07-oct70             |
| <i>Hepacivirus G</i> | Norway rat<br>hepacivirus 1      | NYC-C12                 | KJ950938 | CG    |          | NYC-C12                 |
| <i>Hepacivirus H</i> | Norway rat<br>hepacivirus 2      | NYC-E43                 | KJ950939 | CG    |          | NYC-E43                 |
| <i>Hepacivirus I</i> | rodent hepacivirus               | SAR-3/RSA/2008          | KC411806 | CCG   |          | SAR-3-RSA-2008          |
| <i>Hepacivirus J</i> | rodent hepacivirus               | RMU10-<br>3382/GER/2010 | KC411777 | CCG   |          | RMU10-3382-GER-<br>2010 |
| <i>Hepacivirus K</i> | bat hepacivirus                  | PDB-829                 | KC796074 | CCG   |          | PDB 829                 |
| <i>Hepacivirus L</i> | bat hepacivirus                  | PDB-112                 | KC796077 | CCG   |          | PDB-112                 |
| <i>Hepacivirus M</i> | bat hepacivirus                  | PDB-491.1               | KC796078 | CCG   |          | PDB491.1                |
| <i>Hepacivirus N</i> | bovine<br>hepacivirus            | 463/Ger/2014            | KP641127 | CCG   |          | 463-GER-2014            |

\*CG: Complete Genome; CCG: Coding Complete Genome

Supplementary Figure 1. Taxon search.

## Taxonomy Listing

- Click the (+) sign to expand
- A star (★) indicates the type species
- Click the 'history' link for a list of taxon changes
- The 'history' link is green if the taxon has changed since the last release
- The search box below will search for taxon names across the current or all taxonomy releases

hepatitis  ×

Select to search across all ICTV releases

|                                     | Release | Level   |                                                                                           |
|-------------------------------------|---------|---------|-------------------------------------------------------------------------------------------|
| <input type="button" value="VIEW"/> | 2016    | Species | Unassigned->Hepadnaviridae->Avihepadnavirus->Duck <b>hepatitis B virus</b>                |
| <input type="button" value="VIEW"/> | 2016    | Species | Unassigned->Hepadnaviridae->Avihepadnavirus->Heron <b>hepatitis B virus</b>               |
| <input type="button" value="VIEW"/> | 2016    | Species | Unassigned->Hepadnaviridae->Avihepadnavirus->Parrot <b>hepatitis B virus</b>              |
| <input type="button" value="VIEW"/> | 2016    | Species | Unassigned->Hepadnaviridae->Orthohepadnavirus->Ground squirrel <b>hepatitis virus</b>     |
| <input type="button" value="VIEW"/> | 2016    | Species | Unassigned->Hepadnaviridae->Orthohepadnavirus-> <b>Hepatitis B virus</b>                  |
| <input type="button" value="VIEW"/> | 2016    | Species | Unassigned->Hepadnaviridae->Orthohepadnavirus->Long-fingered bat <b>hepatitis B virus</b> |
| <input type="button" value="VIEW"/> | 2016    | Species | Unassigned->Hepadnaviridae->Orthohepadnavirus->Pomona bat <b>hepatitis B virus</b>        |
| <input type="button" value="VIEW"/> | 2016    | Species | Unassigned->Hepadnaviridae->Orthohepadnavirus->Roundleaf bat <b>hepatitis B virus</b>     |
| <input type="button" value="VIEW"/> | 2016    | Species | Unassigned->Hepadnaviridae->Orthohepadnavirus->Tent-making bat <b>hepatitis B virus</b>   |
| <input type="button" value="VIEW"/> | 2016    | Species | Unassigned->Hepadnaviridae->Orthohepadnavirus->Woodchuck <b>hepatitis virus</b>           |
| <input type="button" value="VIEW"/> | 2016    | Species | Unassigned->Hepadnaviridae->Orthohepadnavirus->Woolly monkey <b>hepatitis B virus</b>     |
| <input type="button" value="VIEW"/> | 2016    | Species | Unassigned->Hepadnaviridae->Unassigned->White sucker <b>hepatitis B virus</b>             |
| <input type="button" value="VIEW"/> | 2016    | Species | Unassigned->Unassigned->Deltavirus-> <b>Hepatitis delta virus</b>                         |

Supplementary Figure 2. Taxonomic proposals.

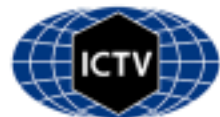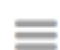

Google Custom Search

Search

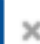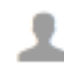

# Animal DNA Viruses and Retroviruses

## Options

[View all](#)

[View slideshow](#)

By date

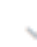

Descending

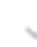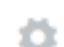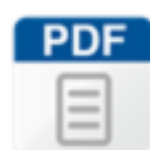

2016.021aD.A.v1.Lentivirus\_sp.pdf

40 downloads [View](#)

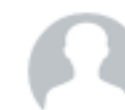

[amqking](#)  
Mar 19, 2017

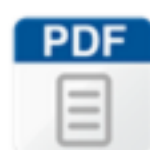

2016.020aD.A.v1.Gammaretrovirus\_s  
p.pdf

28 downloads [View](#)

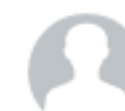

[amqking](#)  
Mar 19, 2017

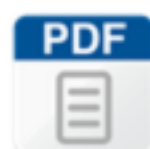

2016.019aD.A.v1.Orthohepadnavirus  
\_sp.pdf

39 downloads [View](#)

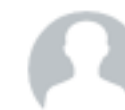

[amqking](#)  
Mar 19, 2017

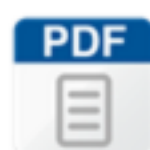

2016.018a-  
dD.A.v3.Centapoxvirus.pdf

27 downloads [View](#)

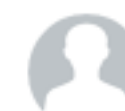

[amqking](#)  
Mar 19, 2017

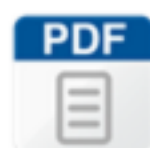

2016.017aD.A.v2.Hepadnaviridae\_sp  
.pdf

23 downloads [View](#)

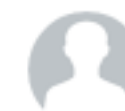

[amqking](#)  
Mar 19, 2017

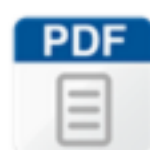

2016.016aD.A.v1.Betapolyomavirus\_  
2sp.pdf

25 downloads [View](#)

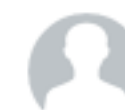

[amqking](#)  
Mar 19, 2017

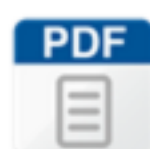

2016.015aD.A.v1.Betapolyomavirus\_  
sp.pdf

24 downloads [View](#)

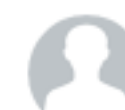

[amqking](#)  
Mar 19, 2017

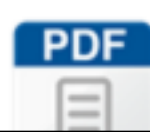

2016.014aD.A.v1.Alphapolyomavirus

[amqking](#)  
Mar 19, 2017
